# Supplementary material
Source: PubMed Central journal article supplement (PMC8166955)
Supplement: NIHMS1667129-supplement-Appendix.pdf [file NIHMS1667129-supplement-Appendix.pdf]

Supplemental Table S1. Algorithm to Determine Primary Care Visit and Primary Care Provider

| Measure                          | Algorithm                                                                                                                                                                                            |
|----------------------------------|------------------------------------------------------------------------------------------------------------------------------------------------------------------------------------------------------|
| Primary care visit               | <b>CPT code:</b> 99201-99215, 99304-99350, 99363-99449, 99487-99490, 99495-99498, 98966-98969, G0463, G0438, G0439                                                                                   |
| Primary care physician           | <b>CMS provider specialty codes:</b> general practice (01), family practice (08), internal medicine (11), geriatric medicine (38)                                                                    |
| Primary care nurse practitioner  | <b>CMS provider specialty codes</b> as nurse practitioner (50), and <b>taxonomy code</b> as primary care nurse practitioner (363L00000X, 363LA2200X, 363LF0000X, 363LG0600X, 363LP2300X, 363LW0102X) |
| Primary care physician assistant | <b>CMS provider specialty codes</b> as physician assistant (97) and <b>taxonomy code</b> as physician assistant (363A00000X, 363AM0700X).                                                            |

Abbreviations: CMS, Centers for Medicare & Medicaid Services; CPT, Current Procedural Terminology

Supplemental Table S2. Flowchart of Study Cohort

| Criteria                                                                                                                                      | PCSA, No. | Practice, No. | Provider, No. | Patients, No. |
|-----------------------------------------------------------------------------------------------------------------------------------------------|-----------|---------------|---------------|---------------|
| First Step: Build up practice within PCSA                                                                                                     |           |               |               |               |
| 20% Randomly selected PCSAs                                                                                                                   | 1 400     | NA            | NA            | NA            |
| PCSA with providers who had at least 1 primary care E&M bill                                                                                  | 1 286     | NA            | NA            | NA            |
| PCSA with provider pairs that shared at least 30 patients                                                                                     | 982       | NA            | NA            | NA            |
| PCSA with a modularity $\geq 0.4$                                                                                                             | 559       | NA            | NA            | NA            |
| Practices in PCSAs with a modularity $\geq 0.4$                                                                                               | 559       | 5 284         | 19 946        | NA            |
| Exclude practices with only 1 provider                                                                                                        | 559       | 5 273         | 19 935        | NA            |
| Select 4 types of practices: MD Only, MD-NP, MD-NP-PA, or MD-PA                                                                               | 557       | 4 776         | 18 615        | NA            |
| Exclude practices with providers working in multiple practices                                                                                | 557       | 4 648         | 17 902        | NA            |
| Second Step: Select Medicare beneficiaries getting care from practice                                                                         |           |               |               |               |
| Select patients with diabetes, CHF, or COPD who had at least 2 office visits to any of the 4648 practices identified through SNA <sup>a</sup> | NA        | 4 479         | NA            | 1 004 506     |
| Exclude those cared for by multiple practices                                                                                                 | NA        | 4 477         | NA            | 951 757       |
| Select patients with complete parts A, B, and D enrollment without Medicare Advantage enrollment in 2014 and 2015.                            | NA        | 4 470         | NA            | 614 291       |
| Select patients alive on 12/31/2015.                                                                                                          | NA        | 4 470         | NA            | 610 572       |
| Select patients aged 66 <sup>b</sup> or above                                                                                                 | NA        | 4 461         | NA            | 492 738       |
| Remove residents in long-term-care nursing facilities                                                                                         | NA        | 4 453         | NA            | 449 725       |
| Remove those with unknown rural/urban residential information                                                                                 | 556       | 4 453         | 17 185        | 449 460       |

Abbreviations: CHF, congestive heart failure; COPD, chronic obstructive pulmonary disease; E&M: evaluation and management; MD, primary care physician; NA, not applicable; NP, nurse practitioner; PA, physician assistant; PCSA, primary care service area; SNA, social network analysis

<sup>a</sup> Chronic condition was based on end-of-year flag in 2015 Master Beneficiary Summary File (MBSF): Chronic Conditions Segment

<sup>b</sup> The age as of January 1<sup>st</sup>, 2015

Supplement Table S3. Baseline Characteristics for All Eligible Beneficiaries and Stratified by Type of Practice

| Variable                  | All            | Type of Practice |                |               |               |
|---------------------------|----------------|------------------|----------------|---------------|---------------|
|                           |                | MD Only          | MD/NP          | MD/NP/PA      | MD/PA         |
| Number of subject         | 449460         | 155565           | 144300         | 88600         | 60995         |
| Age, years                |                |                  |                |               |               |
| Mean (SD)                 | 75.8 (7.1)     | 75.8 (7.1)       | 75.8 (7.1)     | 75.8 (7.0)    | 75.8 (7.1)    |
| 65-70                     | 123 964 (27.6) | 43 116 (27.7)    | 39 877 (27.6)  | 24 161 (27.3) | 16 810 (27.6) |
| 71-75                     | 120 111 (26.7) | 41 641 (26.8)    | 38 093 (26.4)  | 23 919 (27.0) | 16 458 (27.0) |
| 76-80                     | 91 632 (20.4)  | 31 463 (20.2)    | 29 388 (20.4)  | 18 294 (20.6) | 12 487 (20.5) |
| >80                       | 113 753 (25.3) | 39 345 (25.3)    | 36 942 (25.6)  | 22 226 (25.1) | 15 240 (25.0) |
| Gender, %                 |                |                  |                |               |               |
| Male                      | 193 597 (43.1) | 65 822 (42.3)    | 61 785 (42.8)  | 39 250 (44.3) | 26 740 (43.8) |
| Female                    | 255 863 (56.9) | 89 743 (57.7)    | 82 515 (57.2)  | 49 350 (55.7) | 34 255 (56.2) |
| Race/ethnicity, %         |                |                  |                |               |               |
| Non-Hispanic white        | 371 876 (82.7) | 119 499 (76.8)   | 122 584 (85.0) | 77 808 (87.8) | 51 985 (85.2) |
| Black                     | 35 219 (7.8)   | 14 491 (9.3)     | 11 805 (8.2)   | 5 141 (5.8)   | 3 782 (6.2)   |
| Hispanic                  | 24 500 (5.5)   | 12 218 (7.9)     | 5 554 (3.8)    | 3 516 (4.0)   | 3 212 (5.3)   |
| Other                     | 17 865 (4.0)   | 9 357 (6.0)      | 4 357 (3.0)    | 2 135 (2.4)   | 2 016 (3.3)   |
| Dual eligible, %          | 86 003 (19.1)  | 34 219 (22.0)    | 25 979 (18.0)  | 15 655 (17.7) | 10 150 (16.6) |
| Original Entitlement      |                |                  |                |               |               |
| Aged                      | 387 720 (86.3) | 134 760 (86.6)   | 123 714 (85.7) | 76 200 (86.0) | 53 046 (87.0) |
| ESRD/Disability           | 61 740 (13.7)  | 20 805 (13.4)    | 20 586 (14.3)  | 12 400 (14.0) | 7 949 (13.0)  |
| Cohort condition          |                |                  |                |               |               |
| COPD, %                   | 128 620 (28.6) | 42 502 (27.3)    | 42 432 (29.4)  | 26 586 (30.0) | 17 100 (28.0) |
| CHF, %                    | 139 206 (31.0) | 48 327 (31.1)    | 45 487 (31.5)  | 27 263 (30.8) | 18 129 (29.7) |
| Diabetes, %               | 316 514 (70.4) | 111 566 (71.7)   | 100 142 (69.4) | 61 578 (69.5) | 43 228 (70.9) |
| Chronic condition, %      |                |                  |                |               |               |
| Hypertension, %           | 381 791 (84.9) | 132 637 (85.3)   | 123 317 (85.5) | 74 566 (84.2) | 51 271 (84.1) |
| Ischemic heart disease, % | 205 586 (45.7) | 71 222 (45.8)    | 66 141 (45.8)  | 40 558 (45.8) | 27 665 (45.4) |
| Atrial fibrillation, %    | 73 071 (16.3)  | 24 322 (15.6)    | 23 652 (16.4)  | 15 387 (17.4) | 9 710 (15.9)  |
| Hyperlipidemia, %         | 325 887 (72.5) | 113 004 (72.6)   | 104 528 (72.4) | 63 816 (72.0) | 44 539 (73.0) |
| Stroke, %                 | 22 896 (5.1)   | 8 104 (5.2)      | 7 370 (5.1)    | 4 343 (4.9)   | 3 079 (5.0)   |
| Arthritis, %              | 190 296 (42.3) | 66 347 (42.6)    | 62 145 (43.1)  | 36 253 (40.9) | 25 551 (41.9) |
| Asthma, %                 | 38 003 (8.5)   | 13 617 (8.8)     | 12 068 (8.4)   | 7 180 (8.1)   | 5 138 (8.4)   |
| Cancer, %                 | 53 530 (11.9)  | 18 354 (11.8)    | 17 476 (12.1)  | 10 263 (11.6) | 7 437 (12.2)  |
| Chronic kidney disease, % | 148 343 (33.0) | 51 679 (33.2)    | 47 473 (32.9)  | 29 440 (33.2) | 19 751 (32.4) |
| ADRD, %                   | 46 127 (10.3)  | 16 393 (10.5)    | 15 258 (10.6)  | 8 689 (9.8)   | 5 787 (9.5)   |
| Depression, %             | 83 255 (18.5)  | 27 760 (17.8)    | 27 819 (19.3)  | 16 605 (18.7) | 11 071 (18.2) |
| Osteoporosis, %           | 35 714 (7.9)   | 12 589 (8.1)     | 11 340 (7.9)   | 6 866 (7.7)   | 4 919 (8.1)   |
| Residence location, %     |                |                  |                |               |               |
| Metropolitan              | 361 622 (80.5) | 134 949 (86.7)   | 111 515 (77.3) | 66 183 (74.7) | 48 975 (80.3) |
| Urban                     | 80 642 (17.9)  | 18 845 (12.1)    | 30 184 (20.9)  | 20 464 (23.1) | 11 149 (18.3) |
| Rural                     | 7 196 (1.6)    | 1 771 (1.1)      | 2 601 (1.8)    | 1 953 (2.2)   | 871 (1.4)     |

Abbreviations: ADRD: Alzheimer's disease/dementia; CHF: congestive heart failure; COPD: chronic obstructive pulmonary disease; ESRD, end-stage renal disease; MD, primary care physician; NP, nurse practitioner; PA, physician assistant; SD: standard deviation

Supplemental Table S4. Impact of Baseline Characteristics on Health Outcome (N=449460)<sup>a</sup>

| Variable                       | Hospitalization               | ER Admission                  | High-Risk Medication          | Total Spending <sup>§</sup> |
|--------------------------------|-------------------------------|-------------------------------|-------------------------------|-----------------------------|
|                                | OR (95% CI)                   | OR (95% CI)                   | OR (95% CI)                   | CR (SE)                     |
| Age, years                     | Reference: 65-70              |                               |                               |                             |
| 71-75                          | 0.92 (0.90,0.94) <sup>b</sup> | 0.98 (0.96,1.01)              | 0.87 (0.86,0.89) <sup>b</sup> | 0.97 (0.004) <sup>b</sup>   |
| 76-80                          | 0.86 (0.84,0.89) <sup>b</sup> | 0.99 (0.96,1.02)              | 0.78 (0.76,0.80) <sup>b</sup> | 0.92 (0.005) <sup>b</sup>   |
| >80                            | 0.85 (0.83,0.87) <sup>b</sup> | 1.12 (1.09,1.15) <sup>b</sup> | 0.61 (0.60,0.63) <sup>b</sup> | 0.80 (0.005) <sup>b</sup>   |
| Female                         | 0.93 (0.91,0.94) <sup>b</sup> | 0.99 (0.97,1.01)              | 1.39 (1.36,1.41) <sup>b</sup> | 0.96 (0.003) <sup>b</sup>   |
| Race/ethnicity                 |                               |                               |                               |                             |
| Black                          | 0.98 (0.95,1.02)              | 1.12 (1.08,1.16) <sup>b</sup> | 0.84 (0.81,0.87) <sup>b</sup> | 0.93 (0.007) <sup>b</sup>   |
| Hispanic                       | 1.00 (0.96,1.04)              | 1.08 (1.04,1.13) <sup>b</sup> | 0.84 (0.80,0.87) <sup>b</sup> | 0.98 (0.008) <sup>b</sup>   |
| Other                          | 0.98 (0.93,1.03)              | 1.02 (0.96,1.07)              | 0.79 (0.75,0.83) <sup>b</sup> | 0.92 (0.009) <sup>b</sup>   |
| Dual eligible                  | 1.05 (1.02,1.07) <sup>b</sup> | 1.18 (1.15,1.20) <sup>b</sup> | 0.98 (0.96,1.01)              | 0.93 (0.005) <sup>b</sup>   |
| Entitlement as ESRD/Disability | 1.01 (0.99,1.04)              | 1.10 (1.07,1.13) <sup>b</sup> | 1.33 (1.30,1.36) <sup>b</sup> | 1.06 (0.005) <sup>b</sup>   |
| No. of visit from practice     |                               |                               |                               |                             |
| 3 times                        | 1.02 (0.99,1.05)              | 1.03 (1.00,1.06)              | 1.05 (1.02,1.08) <sup>b</sup> | 1.10 (0.005) <sup>b</sup>   |
| More than 3                    | 1.31 (1.28,1.33) <sup>b</sup> | 1.31 (1.28,1.35) <sup>b</sup> | 1.27 (1.24,1.30) <sup>b</sup> | 1.45 (0.004) <sup>b</sup>   |
| Resident area                  |                               |                               |                               |                             |
| Rural/Urban                    | 1.08 (1.05,1.11) <sup>b</sup> | 0.83 (0.81,0.86) <sup>b</sup> | 1.00 (0.97,1.02)              | 1.01 (0.006)                |
| Cohort condition               |                               |                               |                               |                             |
| COPD                           | 2.39 (2.35,2.44) <sup>b</sup> | 2.48 (2.43,2.54) <sup>b</sup> | 1.11 (1.09,1.13) <sup>b</sup> | 1.47 (0.004) <sup>b</sup>   |
| CHF                            | 1.97 (1.93,2.01) <sup>b</sup> | 2.10 (2.06,2.15) <sup>b</sup> | 1.06 (1.04,1.08) <sup>b</sup> | 1.47 (0.004) <sup>b</sup>   |
| Diabetes                       | 0.92 (0.90,0.94) <sup>b</sup> | 0.94 (0.92,0.96) <sup>b</sup> | 1.13 (1.11,1.16) <sup>b</sup> | 1.02 (0.004) <sup>b</sup>   |
| Chronic condition              |                               |                               |                               |                             |
| Hypertension                   | 2.20 (2.14,2.27) <sup>b</sup> | 2.15 (2.07,2.22) <sup>b</sup> | 1.04 (1.02,1.07) <sup>b</sup> | 1.30 (0.005) <sup>b</sup>   |
| Ischemic heart disease         | 1.44 (1.42,1.47) <sup>b</sup> | 1.40 (1.37,1.43) <sup>b</sup> | 1.05 (1.03,1.07) <sup>b</sup> | 1.40 (0.004) <sup>b</sup>   |
| Atrial fibrillation            | 1.86 (1.83,1.90) <sup>b</sup> | 1.85 (1.81,1.89) <sup>b</sup> | 1.20 (1.18,1.23) <sup>b</sup> | 1.43 (0.005) <sup>b</sup>   |
| Hyperlipidemia                 | 1.60 (1.57,1.63) <sup>b</sup> | 1.51 (1.48,1.54) <sup>b</sup> | 0.96 (0.94,0.98) <sup>b</sup> | 1.24 (0.004) <sup>b</sup>   |
| Stroke                         | 2.81 (2.73,2.90) <sup>b</sup> | 2.97 (2.88,3.06) <sup>b</sup> | 1.03 (0.99,1.06)              | 1.67 (0.007) <sup>b</sup>   |
| Arthritis                      | 1.45 (1.42,1.47) <sup>b</sup> | 1.12 (1.10,1.14) <sup>b</sup> | 1.45 (1.42,1.47) <sup>b</sup> | 1.53 (0.003) <sup>b</sup>   |
| Asthma                         | 1.91 (1.86,1.96) <sup>b</sup> | 1.83 (1.78,1.88) <sup>b</sup> | 1.15 (1.12,1.18) <sup>b</sup> | 1.44 (0.006) <sup>b</sup>   |
| Cancer                         | 1.93 (1.88,1.97) <sup>b</sup> | 1.67 (1.63,1.71) <sup>b</sup> | 1.04 (1.01,1.06) <sup>b</sup> | 1.81 (0.005) <sup>b</sup>   |
| Chronic kidney disease         | 2.17 (2.13,2.21) <sup>b</sup> | 2.33 (2.29,2.37) <sup>b</sup> | 1.01 (1.00,1.03)              | 1.50 (0.004) <sup>b</sup>   |
| ADRD                           | 1.43 (1.39,1.47) <sup>b</sup> | 1.61 (1.57,1.65) <sup>b</sup> | 1.00 (0.97,1.03)              | 1.12 (0.005) <sup>b</sup>   |
| Depression                     | 1.66 (1.62,1.69) <sup>b</sup> | 1.69 (1.66,1.73) <sup>b</sup> | 1.50 (1.47,1.53) <sup>b</sup> | 1.40 (0.004) <sup>b</sup>   |
| Osteoporosis                   | 1.66 (1.61,1.70) <sup>b</sup> | 1.63 (1.58,1.68) <sup>b</sup> | 1.02 (0.99,1.05)              | 1.41 (0.006) <sup>b</sup>   |

Abbreviations: ADRD: Alzheimer's disease/dementia; CHF: congestive heart failure; CI, confident interval; COPD: chronic obstructive pulmonary disease; CR, cost ratio; ESRD, end-stage renal disease; OR, odds ratio; SE, standard error

<sup>a</sup> Full model with random intercept on practice

<sup>b</sup> Statistical significant on odds ratio and cost ratio estimation
